# Supplementary material
Source: ML conference proceedings conference paper supplement (https://openaccess.thecvf.com/content/cvpr_2017/html/Shrivastava_Learning_From_Simulated_2017_CVPR_paper.html)
Supplement: Supplementary file 1 [file Shrivastava_Learning_From_Simulated_2017_CVPR_supplemental.pdf]

Archive with 6 entries (3 files):
- 0767-supp/
- 0767-supp/0767-supp.pdf
- __MACOSX/
- __MACOSX/0767-supp/
- __MACOSX/0767-supp/._0767-supp.pdf
- 0767-supp/nyu_hand_test.mp4
