# Supplementary material
Source: ML conference proceedings conference paper supplement (https://openaccess.thecvf.com/content/cvpr_2017/html/Shrivastava_Learning_From_Simulated_2017_CVPR_paper.html)
Supplement: Supplementary file 1 [file Shrivastava_Learning_From_Simulated_2017_CVPR_supplemental.pdf › 0767-supp/0767-supp.pdf]

# Supplementary Material for: ‘Learning from Simulated and Unsupervised Images through Adversarial Training’

Ashish Shrivastava, Tomas Pfister, Oncel Tuzel, Josh Susskind, Wenda Wang, Russ Webb  
Apple Inc

{a\_shrivastava,tpf,otuzel,jsusskind,wenda\_wang,rwebb}@apple.com

## Additional Experiments for Appearance-based Gaze Estimation

**Dataset:** The gaze estimation dataset consists of 1.2M synthetic images from eye gaze synthesizer UnityEyes [2] and 214K real images from the MPIIGaze dataset [3] – samples shown in Figure 1. MPIIGaze is a very challenging eye gaze estimation dataset captured under extreme illumination conditions. For UnityEyes we use a single generic rendering environment to generate training data without any dataset-specific targeting.

**Qualitative Results:** In Figure 2, we show many examples of synthetic, and refined images from the eye gaze dataset. We show many pairs of synthetic and refined in multiple rows. The top row contains synthetic images, and the bottom row contains corresponding refined images. As shown, we observe a significant qualitative improvement of the synthetic images: SimGAN successfully captures the skin texture, sensor noise and the appearance of the iris region in the real images. Note that our method preserves the annotation information (gaze direction) while improving the realism.

**Comparison to Baselines:** We also implemented three simple baselines: (1) pixel-wise Gaussian sampling of noise from real images (from difference of mean images over real & synthetic datasets): 11.1; (2) histogram equalizing both real & synthetic images: 10.2; (3) histogram matching synthetic to distribution of real images: 10.9. Compare these to using synthetic (11.2) and refined images (7.8).

**Within-dataset experiment for MPIIGaze:** As in [3], we conducted a within-dataset experiment with leave-one-subject-out training on MPIIGaze and achieved an average error of 5.4 degrees.

## Additional Experiments for Hand Pose Estimation

**Dataset:** Next, we evaluate our method for hand pose estimation in depth images. We use the NYU hand pose dataset [1] that contains 72,757 training frames

and 8,251 testing frames. Each depth frame is labeled with hand pose information that has been used to create a synthetic depth image. We pre-process the data by cropping the pixels from real images using the synthetic images. Figure 3 shows example real depth images from the dataset. The images are resized to  $224 \times 224$  before passing them to the refiner network.

**Quantitative Results:** We show examples of synthetic and refined hand depth images in Figure 4 from the test set. We show our results in multiple pairs of rows. The top row in each pair, contains synthetic depth image, and the bottom row shows the corresponding refined image using the proposed SimGAN approach. Note the realism added to the depth boundary in the refined images, compare to the real images in Figure 3. Furthermore, we also made a video, containing the synthetic, refined, and real test images. The examples in Figure 4 are a small subset of images in the video.

## Convergence Experiment

To investigate the convergence of our method, we visualize intermediate results as training progresses. As shown in Figure 5, in the beginning, the refiner network learns to predict very smooth edges using only the self-regularization loss. As the adversarial loss is enabled, the network starts adding artifacts at the depth boundaries. However, as these artifacts are not the same as real images, the discriminator easily learns to differentiate between the real and refined images. Slowly the network starts adding realistic noise, and after many steps, the refiner generates very realistic-looking images. We found it helpful to train the network with a low learning rate and for a large number of steps. For NYU hand pose we used  $lr=0.0002$  in the beginning, and reduced to  $0.00005$  after 600,000 steps.

## Computational cost

Training takes 42h for 50,000 iterations with 8 TITAN X GPUs; inference takes 5ms.

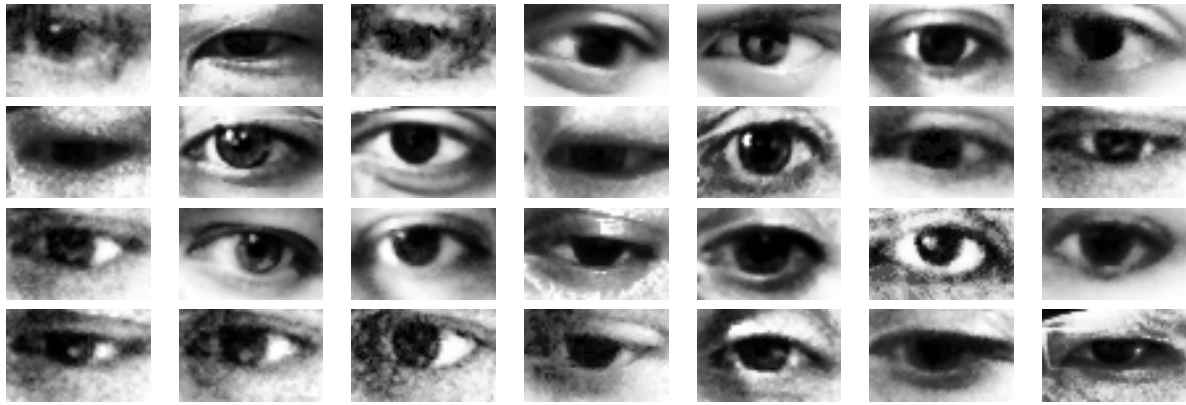

Figure 1. Example real images from MPIIGaze dataset.

## References

- [1] J. Tompson, M. Stein, Y. Lecun, and K. Perlin. Real-time continuous pose recovery of human hands using convolutional networks. *ACM Trans. Graphics*, 2014. [1](#)
- [2] E. Wood, T. Baltrušaitis, L. Morency, P. Robinson, and A. Bulling. Learning an appearance-based gaze estimator from one million synthesised images. In *Proc. ACM Symposium on Eye Tracking Research & Applications*, 2016. [1](#)
- [3] X. Zhang, Y. Sugano, M. Fritz, and A. Bulling. Appearance-based gaze estimation in the wild. In *Proc. CVPR*, 2015. [1](#)

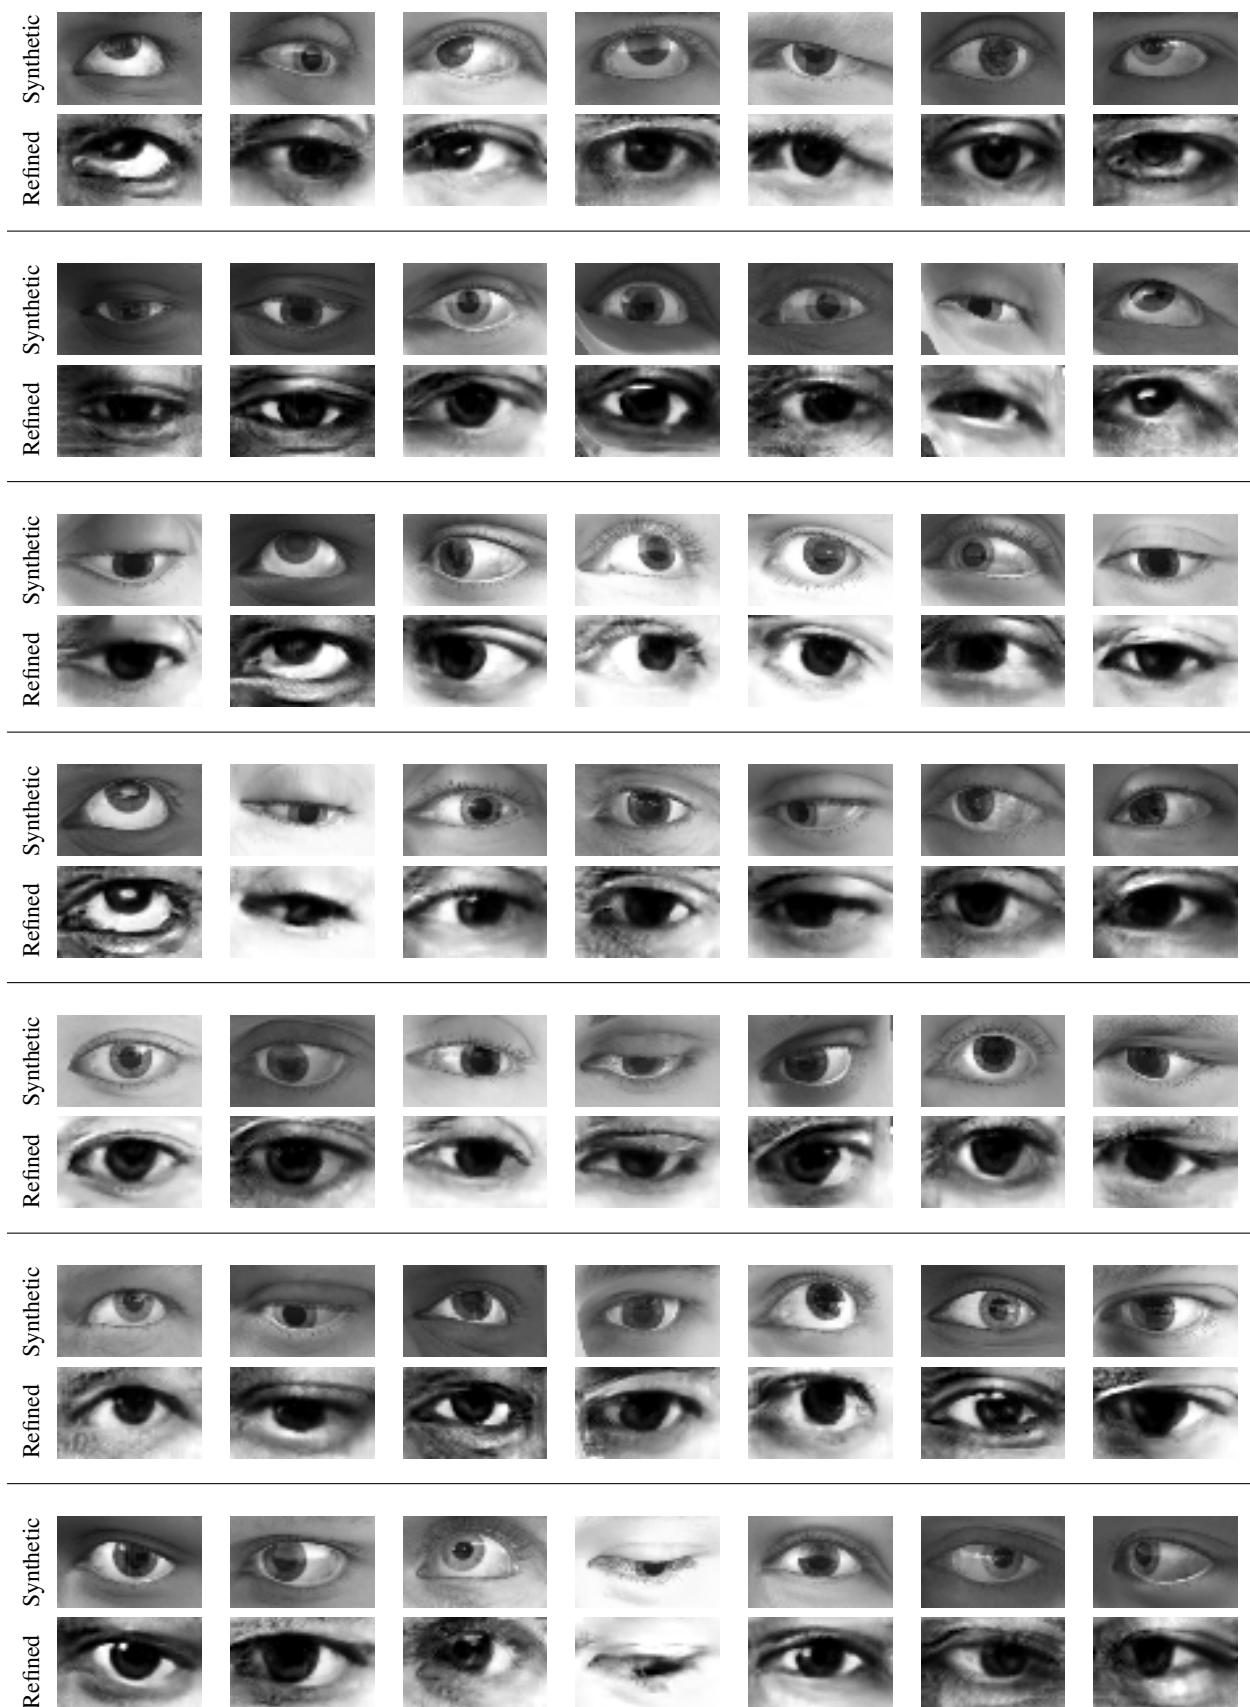

Figure 2. Qualitative results for automatic refinement of simulated eyes. The top row (in each set of two rows) shows the synthetic eye image, and the bottom row is the corresponding refined image.

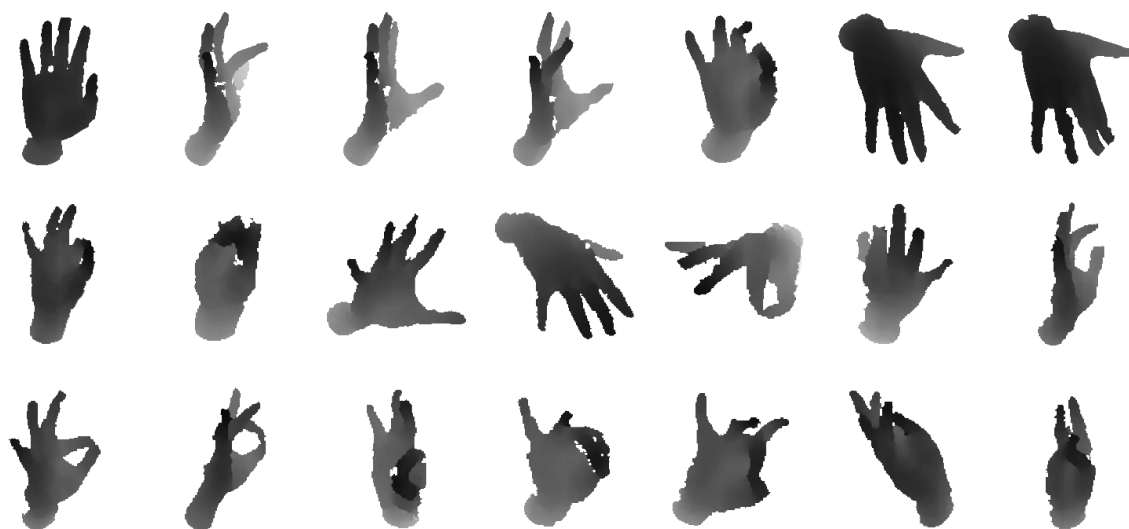

Figure 3. Example real test images of NYU hand dataset.

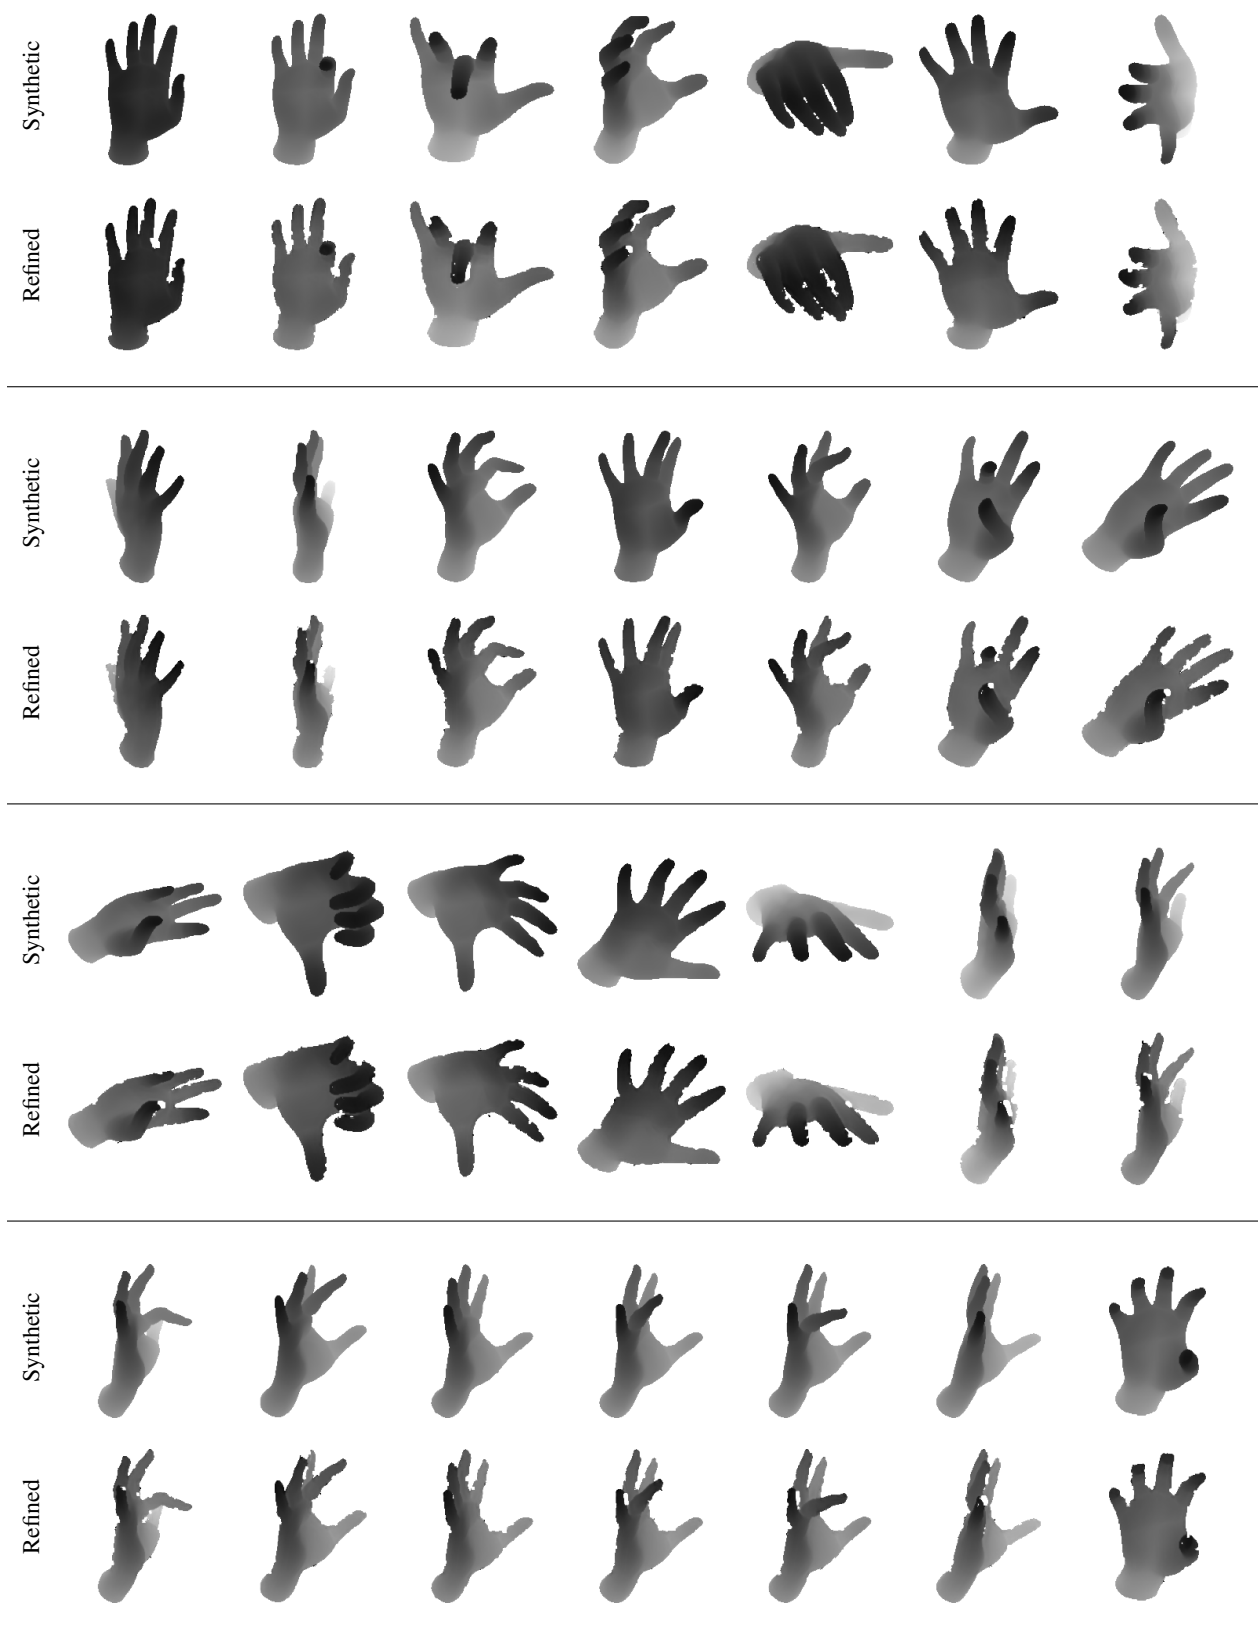

Figure 4. Qualitative results for automatic refinement of NYU hand depth images. The top row (in each set of two rows) shows the synthetic hand image, and the bottom row is the corresponding refined image. Note how realistic the depth boundaries are compared to real images in Figure ??

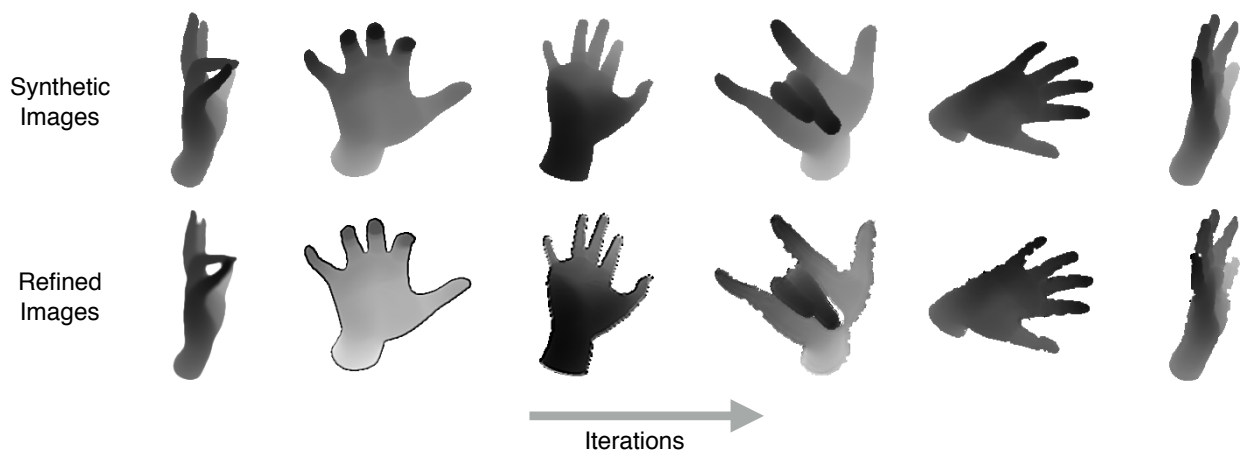

Figure 5. SimGAN output as a function of training iterations for NYU hand pose. Columns correspond to increasing training iterations. First row shows synthetic images, and the second row shows corresponding refined images. The first column is the result of training with  $\ell_1$  image difference for 300 steps; the later rows show the result when trained on top of this model. In the beginning the adversarial part of the cost introduces different kinds of unrealistic noise to try beat the adversarial network  $D_\phi$ . As the dueling between  $R_\theta$  and  $D_\phi$  progresses,  $R_\theta$  learns to model the right kind of noise.
